# Supplementary material for: Incidence, Risk Factors and Prediction of Secondary Hyperparathyroidism in Preterm Neonates under 32 Weeks’ Gestational Age
Source: MDPI journal article supplement (doi:10.3390/nu14163397), 2022-08-18
Supplement: s1 [file s1]

| Supplementary Table S1. Univariate analysis in relation to HPTH. |                      |                      |         |
|------------------------------------------------------------------|----------------------|----------------------|---------|
| Perinatal characteristics                                        | HPTH (n=62)          | NO HPTH (n=92)       | p-value |
| $\bar{X} \pm SD$                                                 |                      |                      |         |
| Gestational age                                                  | 29.02 $\pm$ 1.90     | 30.16 $\pm$ 2.07     | <0.001  |
| Birth weight                                                     | 1089.35 $\pm$ 259.58 | 1217.01 $\pm$ 248.22 | 0.630   |
| Weight Z-score at birth                                          | -0.39 $\pm$ 0.89     | -0.56 $\pm$ 0.66     | 0.230   |
| Length Z score at birth                                          | 0.03 $\pm$ 1.33      | 0.07 $\pm$ 1.06      | 0.474   |
| Z score at birth                                                 | -0.31 $\pm$ 1.06     | -0.41 $\pm$ 1.15     | 0.564   |
| Maternal age (years)                                             | 32.45 $\pm$ 6.73     | 34.14 $\pm$ 6.00     | 0.148   |
| Maternal BMI                                                     | 27.47 $\pm$ 7.61     | 24.73 $\pm$ 4.67     | 0.030   |
| No. (%)                                                          |                      |                      |         |
| Maternal hypertension                                            | 17 (27.4)            | 17 (0.18)            | 0.190   |
| Chorioamnionitis                                                 | 10 (16.1)            | 11 (12.0)            | 0.459   |
| Maternal smoking                                                 | 7 (11.3)             | 11 (12.0)            | 0.842   |
| Vaginal delivery                                                 | 11 (17.7)            | 30 (32.6)            | 0.041   |
| Sex (females)                                                    | 33 (53.2)            | 48 (52.2)            | 0.285   |
| IVF                                                              | 13 (21.0)            | 24 (26.1)            | 0.466   |
| IUGR                                                             | 9 (14.5)             | 14 (15.2)            | 0.905   |
| Moderate-severe IUGR                                             | 4 (6.5)              | 6 (6.5)              | 0.986   |

|                                    |                     |                       |                |
|------------------------------------|---------------------|-----------------------|----------------|
| Antenatal steroids                 | 60 (96.8)           | 90 (97.8)             | 0.687          |
| Oxygen during resuscitation        | 58 (93.5)           | 70 (76.1)             | 0.005          |
| Intubation in delivery room        | 15 (24.2)           | 9 (9.8)               | 0.016          |
| <b>Neonatal evolution</b>          | <b>HPTH (n=62)</b>  | <b>NO HPTH (n=92)</b> | <b>p-value</b> |
| <b><math>\bar{X} \pm SD</math></b> |                     |                       |                |
| IMV hours                          | 142.40 $\pm$ 177.44 | 209.50 $\pm$ 277.46   | 0.786          |
| NIMV hours                         | 247.82 $\pm$ 218.86 | 164.69 $\pm$ 163.47   | 0.023          |
| Hours of oxygen therapy            | 700.27 $\pm$ 688.59 | 514.07 $\pm$ 618.49   | 0.190          |
| Maximum FiO <sub>2</sub>           | 37.71 $\pm$ 13.55   | 34.17 $\pm$ 12.52     | 0.095          |
| Z-score weight at discharge        | -1.37 $\pm$ 1.31    | -1.50 $\pm$ 1.07      | 0.674          |
| Admission (days)                   | 71.80 $\pm$ 95.254  | 51.26 $\pm$ 20.99     | 0.003          |
| <b>No. (%)</b>                     |                     |                       |                |
| IMV                                | 35 (56.5)           | 20 (21.7)             | <0.001         |
| NIMV                               | 42 (67.7)           | 37 (40.2)             | 0.001          |
| Oxygen therapy                     | 51 (82.3)           | 60 (65.2)             | 0.021          |
| Surfactant                         | 38 (61.3)           | 32 (34.8)             | 0.001          |
| BPD                                | 24 (38.7)           | 16 (17.4)             | 0.003          |
| Corticosteroids for BPD            | 10 (16.1)           | 8 (8.7)               | 0.159          |
| PDA                                | 15 (24.2)           | 10 (10.9)             | 0.028          |

|                                             |                    |                       |                |
|---------------------------------------------|--------------------|-----------------------|----------------|
| PDA ligation                                | 8 (12.9)           | 3 (3.3)               | 0.023          |
| NEC                                         | 6 (9.7)            | 2 (2.2)               | 0.040          |
| Anemia requiring transfusion                | 50 (80.6)          | 50 (54.3)             | 0.001          |
| Nosocomial sepsis                           | 31 (50.0)          | 26 (28.3)             | 0.006          |
| ROP $\geq$ II                               | 12 (19.5)          | 5 (5.4)               | 0.040          |
| PVL                                         | 3 (4.8)            | 2 (2.2)               | 0.360          |
| Home oxygen                                 | 6 (9.7)            | 1 (1.1)               | 0.012          |
| Furosemide                                  | 1 (1.6)            | 5 (5.4)               | 0.229          |
| Thiazides                                   | 3 (4.8)            | 2 (2.2)               | 0.360          |
| Spironolactone                              | 1 (1.6)            | 3 (3.3)               | 0.528          |
| Breastfeeding fortification                 | 44 (71.0)          | 80 (87.0)             | 0.014          |
| Oral P supplements                          | 20 (32.3)          | 31 (33.7)             | 0.853          |
| Oral Ca supplements                         | 50 (80.6)          | 80 (87.0)             | 0.290          |
| Oral supplements Vit D                      | 60 (96.8)          | 92 (100.0)            | 0.083          |
| MBD                                         | 7 (11.3)           | 15 (16.3)             | 0.383          |
| <b>Biochemical and screening parameters</b> | <b>HPTH (n=62)</b> | <b>NO HPTH (n=92)</b> | <b>p-value</b> |
| $\bar{X} \pm SD$                            |                    |                       |                |
| Serum P (mg/dl)                             | 6.37 $\pm$ 1.04    | 5.78 $\pm$ 1.22       | 0.013          |
| Serum Ca (mg/dl)                            | 9.65 $\pm$ 0.67    | 9.88 $\pm$ 0.50       | 0.043          |

|                   |               |               |         |
|-------------------|---------------|---------------|---------|
| Vitamin D (mg/ml) | 32.14 ± 11.59 | 36.24 ± 11.95 | 0.044   |
| ALP (IU/L)        | 815.5 ± 326   | 890.9 ± 385   | 0.195   |
| Urine P (mg/dl)   | 14.92 ± 14.52 | 9.52 ± 12.11  | 0.029   |
| Urine Ca (mg/dl)  | 5.68 ± 4.44   | 8.91 ± 6.58   | 0.002   |
| Ca/Cr urine       | 0.55 ± 0.32   | 1.22 ± 1.96   | 0.002   |
| P/Ca urine        | 3.55 ± 5.01   | 1.62 ± 2.94   | < 0.001 |

BMI = Body Mass Index; IVF = In-vitro fertilization; IUGR =Intrauterine growth restriction; IMV = Invasive mechanical ventilation; NIMV = Non-invasive mechanical ventilation; NICU = Neonatal intensive care unit; MBD = Metabolic bone disease; BPD = Bronchopulmonary dysplasia; PDA = Patent ductus arteriosus; NEC = Necrotizing Enterocolitis; ROP = Retinopathy of Prematurity; IVH = Intraventricular hemorrhage; PVL =Periventricular Leukomalacia; ALP = Alkaline phosphatase; PTH = Parathyroid hormone; Ca = Calcium; P = Phosphorus; Cr = Creatinine
